# Supplementary material for: SUV39H2 methylates and stabilizes LSD1 by inhibiting polyubiquitination in human cancer cells
Source: PubMed Central journal article supplement (PMC4627283; doi:10.18632/oncotarget.4760), 2015-07-03
Supplement: oncotarget-06-16939-s001.pdf [file oncotarget-06-16939-s001.pdf]

**SUV39H2 methylates and stabilizes LSD1 by inhibiting polyubiquitination in human cancer cells**

**Supplementary Material**

The file contains

Supplementary Information Figure S1 - S2

Supplementary Information Tables S1 - S3

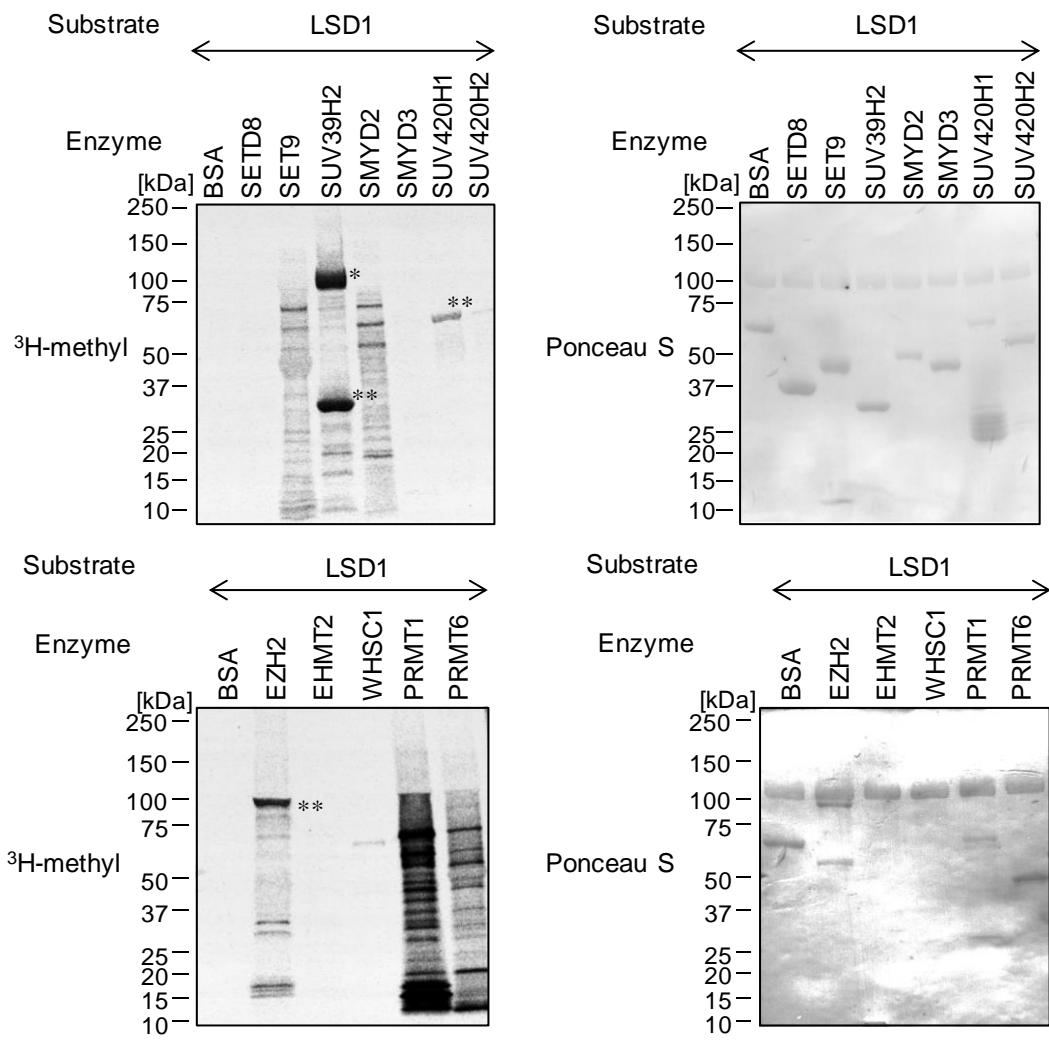

**Figure S1: SUV39H2 methylates LSD1 *in vitro*.** Recombinant LSD1 protein was incubated with a variety of methyltransferases, and methylaton signal was detected by autoradiography. Amounts of loading proteins were evaluated by staining with Ponceau S. \*, LSD1 methylation band. \*\*, automethylation band.

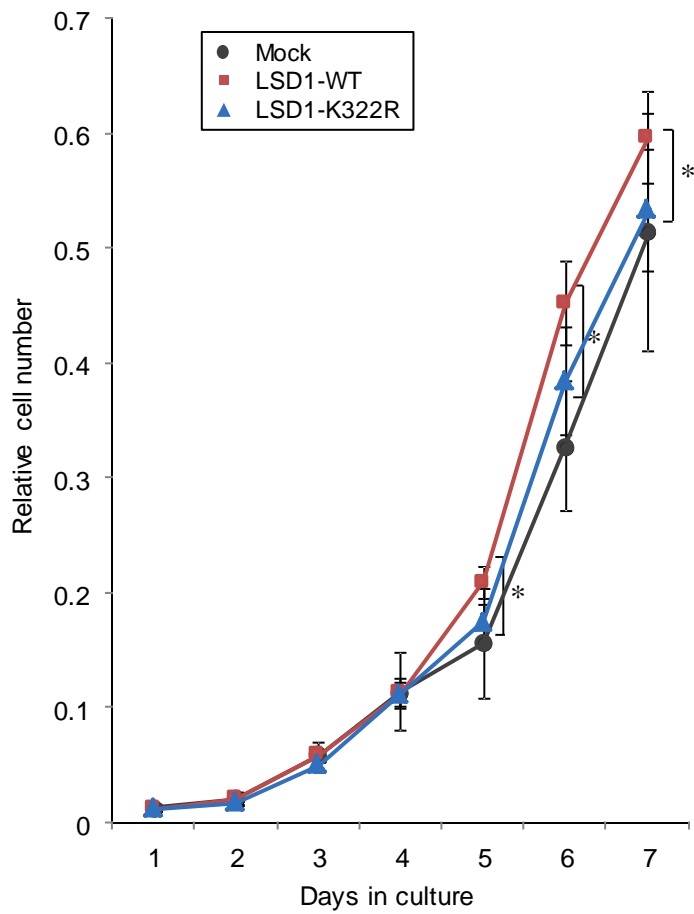

**Figure S2: The cell growth assay of stable transformants.** HeLa cells were transfected with Mock, LSD1-WT and LSD1-K322R expression vectors and selected by geneticin (G418) as described in Methods. Relative cell amount was measured by cell counting kit 8 (CCK8): results are the mean  $\pm$ SD of three independent experiments.  $P$  values were calculated using Student's  $t$ -test (\*,  $P < 0.05$ ).

**Table S1: Information of certificated cell lines**

| <b>Name</b> | <b>Certification institution</b> | <b>Tested method</b> | <b>DNA profile</b>                                                                                                        |
|-------------|----------------------------------|----------------------|---------------------------------------------------------------------------------------------------------------------------|
| <b>293T</b> | ATCC                             | STR                  | Amelogenin: X CSF1PO: 11, 12 D13S317: 12, 14 D16S539: 9, 13 D5S818: 8, 9 D7S820: 11 THO1: 7, 9.3 TPOX: 11 vWA: 16, 18, 19 |
| <b>HeLa</b> | ATCC                             | STR                  | Amelogenin: X,Y CSF1PO: 11,12 D13S317: 11,14 D16S539: 9,11 D5S818: 11,12 D7S820: 10,11 THO1: 8 TPOX: 8 vWA: 15            |
| <b>A549</b> | ATCC                             | STR                  | Amelogenin: X,Y CSF1PO: 10,12 D13S317: 11 D16S539: 11,12 D5S818: 11 D7S820: 8,11 THO1: 8,9.3 TPOX: 8,11 vWA: 14           |
| <b>SBC5</b> | JCRB                             | STR                  | Amelogenin:XY TPOX:9,12 CSF1PO:10 D5S818:10,11 D13S317:8,10 D7S820:8,11 D16S539:12 vWA:14,18 THO1:6                       |

ATCC; American Type Culture Collection

JCRB; Japanese Collection of Research Bioresources

**Table S2: siRNA sequences**

| <b>siRNA name</b> | <b>Sequence</b> |                     |
|-------------------|-----------------|---------------------|
| siEGFP            | Sense           | GCAGCACGACUUCUUCAAG |
|                   | Antisense       | CUUGAAGAAGUCGUGCUGC |
| siSUV39H2#1       | Sense           | CACAGAUUGCUUCUUCAA  |
|                   | Antisense       | UUGAAAGAAGCAAUCUGUG |
| siSUV39H2#2       | Sense           | CUGGAAUCAGCUUAGUCAA |
|                   | Antisense       | UUGACUAAGCUGAUUCCAG |
| siLSD1            | Sense           | CUAUGUAGCUGAUCUUGGA |
|                   | Antisense       | UCCAAGAUCAGCUACAUAG |

**Table S3: Primer sequences for quantitative RT-PCR**

| <b>Gene name</b>    | <b>Primer sequence</b>         |
|---------------------|--------------------------------|
| <i>hSOX2 - f</i>    | 5' TGCGAGCGCTGCACAT 3'         |
| <i>hSOX2 - r</i>    | 5' TCATGAGCGTCTTGGTTTTCC 3'    |
| <i>hCoREST - f</i>  | 5' CCGCCAAACTGGCAAGAC 3'       |
| <i>hCoREST - r</i>  | 5' TGGGTGACCAGACCAACATG 3'     |
| <i>hLSD1 - f</i>    | 5' TGGTGGTAACAGGTCTTGGAGG 3'   |
| <i>hLSD1 - r</i>    | 5' GGCTTCATAAAGTGGGCATTTTTG 3' |
| <i>hSUV39H2 - f</i> | 5' TGGGGTGTAAGACCCTTGTG 3'     |
| <i>hSUV39H2 - r</i> | 5' ATTCCCTTGTTGTCATAGAAC 3'    |
| <i>hCDKN1A - f</i>  | 5' GGAAGACCATGTGGACCTGT 3'     |
| <i>hCDKN1A - r</i>  | 5' GCGGTTTGGAGTGGTAGAAA 3'     |
| <i>mCdkn1a - f</i>  | 5' TTGCACTCTGGTGTCTGAGC 3'     |
| <i>mCdkn1a - r</i>  | 5' TCTGCGCT GGAGTGATAGA 3'     |
| <i>mSox2- f</i>     | 5' GAACGCCTTCATGGTATGGT 3'     |
| <i>mSox2- r</i>     | 5' TTGCTGATCTCCGAGTTGTG 3'     |
